# Supplementary material for: Ionophore-based ion optodes without a reference ion: electrogenerated chemiluminescence for potentiometric sensors
Source: Royal Society of Chemistry journal article supplement (doi:10.1039/c2an35516g), 2012-01-01

## Electronic Supplementary Information

### **Ionophore-Based Ion Optodes without a Reference Ion: Electrogenerated Chemiluminescence for Potentiometric Sensors**

**Gastón A. Crespo and Eric Bakker\***

*Department of Inorganic and Analytical Chemistry, Quai E.-Ansermet 30, University of Geneva, 1211 Geneva 4, Switzerland. E-mail: eric.bakker@unige.ch*

#### **Contents:**

**Fig 1S – Linear sweep voltammograms using the ion-selective electrode (for calcium, sodium and potassium) as reference counterpart.**

**Fig 2S – ECL readout signal for sodium electrode.**

**Fig 3S – ECL readout signal for potassium electrode.**

**Fig 4S – Selectivity coefficients determination for Ca<sup>2+</sup> sensor.**

**Fig 5S – Selectivity coefficients determination for Na<sup>+</sup> sensor.**

**Fig 6S – Selectivity coefficients determination for K<sup>+</sup> sensor.**

**Fig 7S – Potentiometric calibration curve for calcium in different background electrolytes.**

**Fig 8S – Potentiometric calibration curve for sodium in different background electrolytes.**

**Fig 9S – Potentiometric calibration curve for potassium in different background electrolytes.**

**Fig 1S** – Linear sweep voltammograms using calcium, sodium and potassium ion selective electrodes as reference counterpart in the ECL read-out respectively. The horizontal arrow indicates the increasing concentration of primary analyte. **Inset:** Calibration curve, difference of potential as a function of the log ion activity shows the Nernstian behavior of each individual shift.

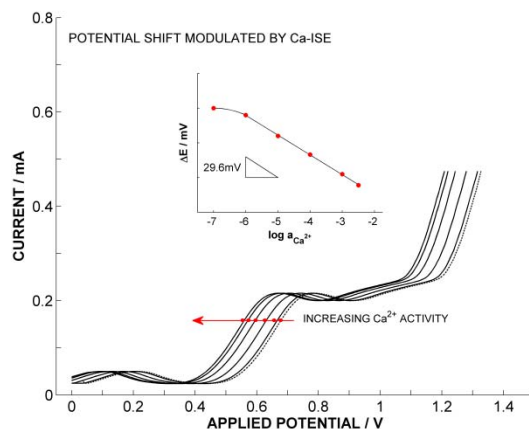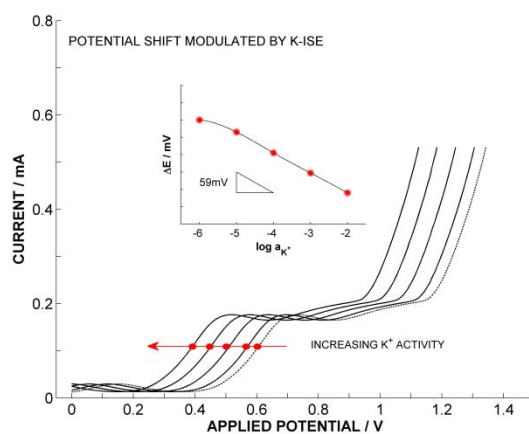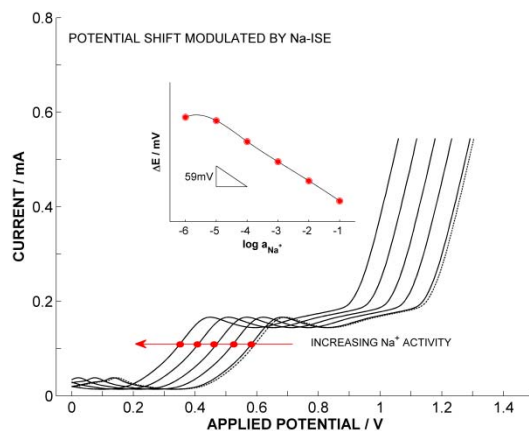

**Fig 2S-** ECL peaks for Na-ISM at three different applied potentials (0.7, 0.75 and 0.8V)

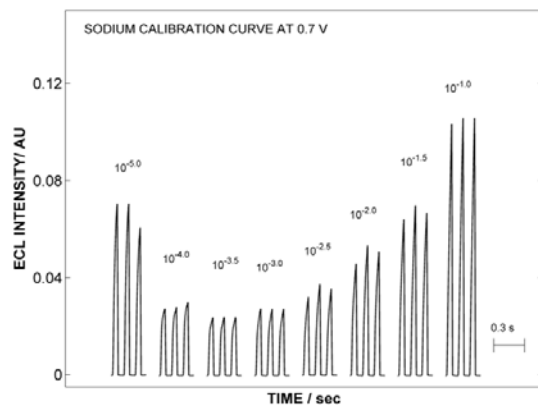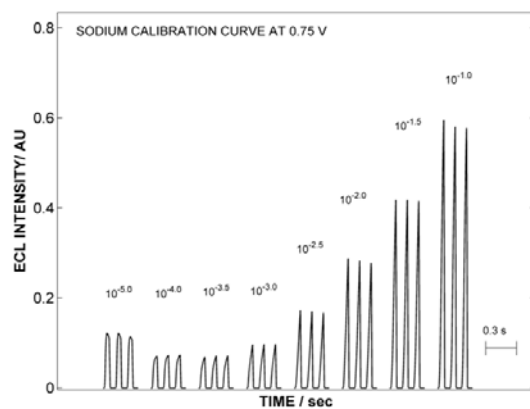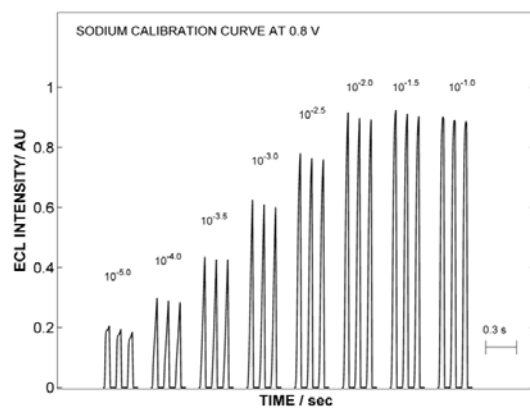

**Fig 3S** - ECL peaks for K-ISM at three different applied potentials (0.7, 0.8 and 0.85V).

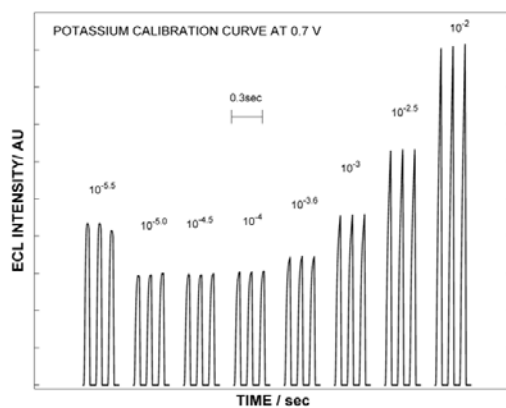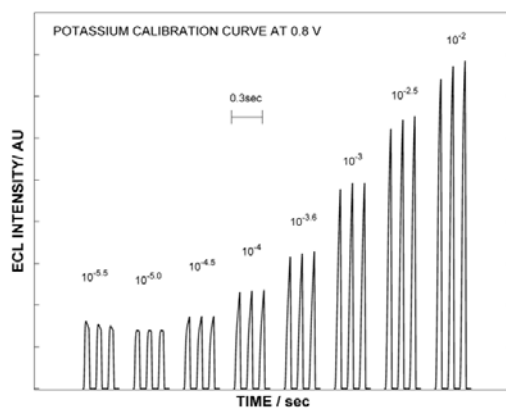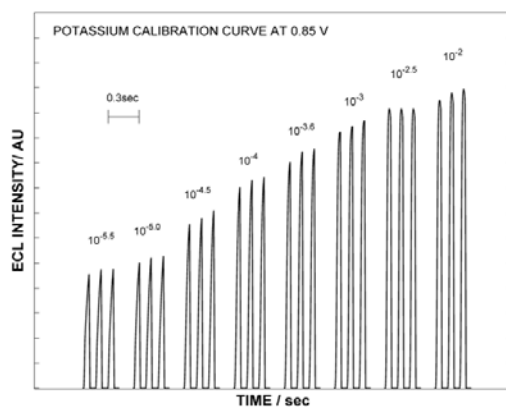

**Fig 4S** – Calcium selectivity coefficients determination by SSM.

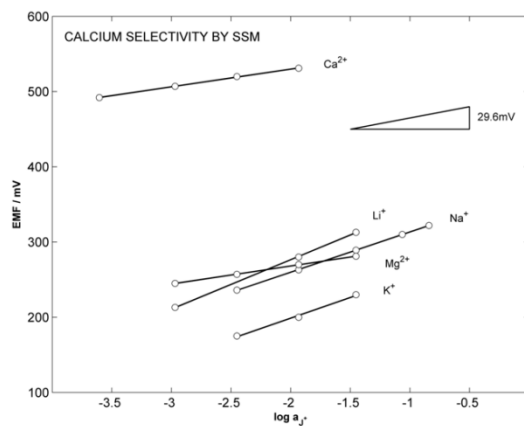

**Fig 5S** – Sodium selectivity coefficients determination by SSM.

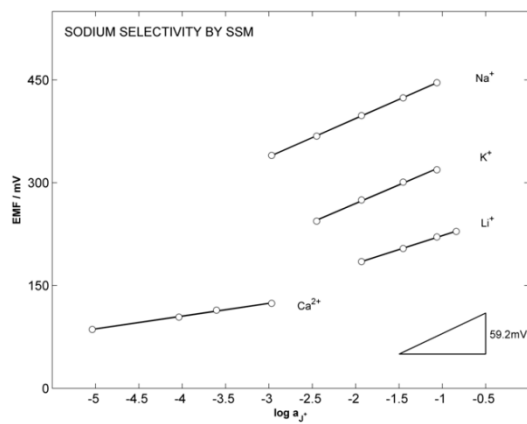

**Fig 6S** – Potassium selectivity coefficients determination by SSM.

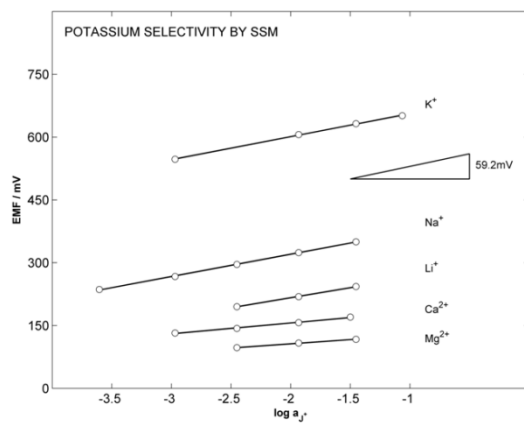

**Fig 7S** – Potentiometric calibration curve for calcium in different background electrolytes. (o) Water, (•) 10 mM LiCl and (□) 150 mM Na<sup>+</sup> + 1 mM K<sup>+</sup> + 10mM LiCl

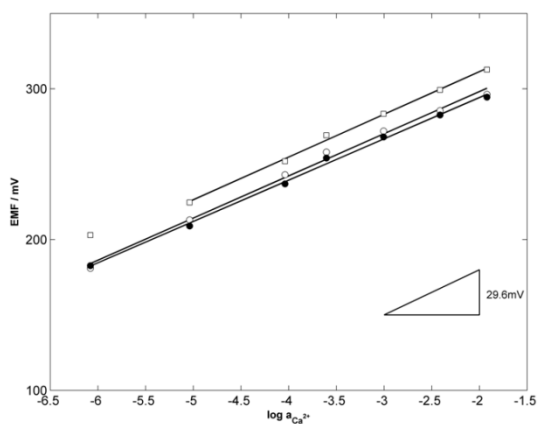

**Fig 8S** – Potentiometric calibration curve for sodium in different background electrolytes. (o) Water, (•) 10 mM LiCl and (□) 1 mM Ca<sup>2+</sup> + 1 mM K<sup>+</sup> + 10mM LiCl

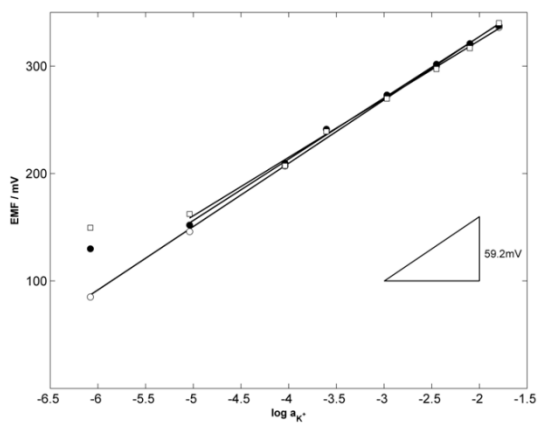

**Fig 9S** – Potentiometric calibration curve for potassium in different background electrolytes. (o) Water, (•) 10 mM LiCl and (□) 1 mM Ca<sup>2+</sup> + 150 mM Na<sup>+</sup> + 10mM LiCl

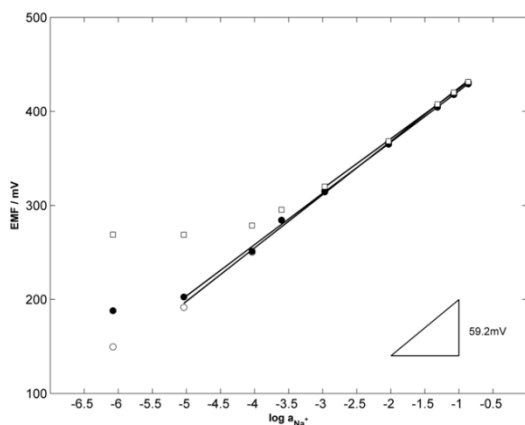

Supplement: c2an35516g.pdf [file c2an35516g.pdf]
